# Supplementary figures and images for: Incidence and Outcome of Patients with Cardiogenic Shock and Detection of Herpes Simplex Virus in the Lower Respiratory Tract
Source: MDPI journal article supplement (doi:10.3390/jcm11092351), 2022-04-22

Figure S1: Patient selection

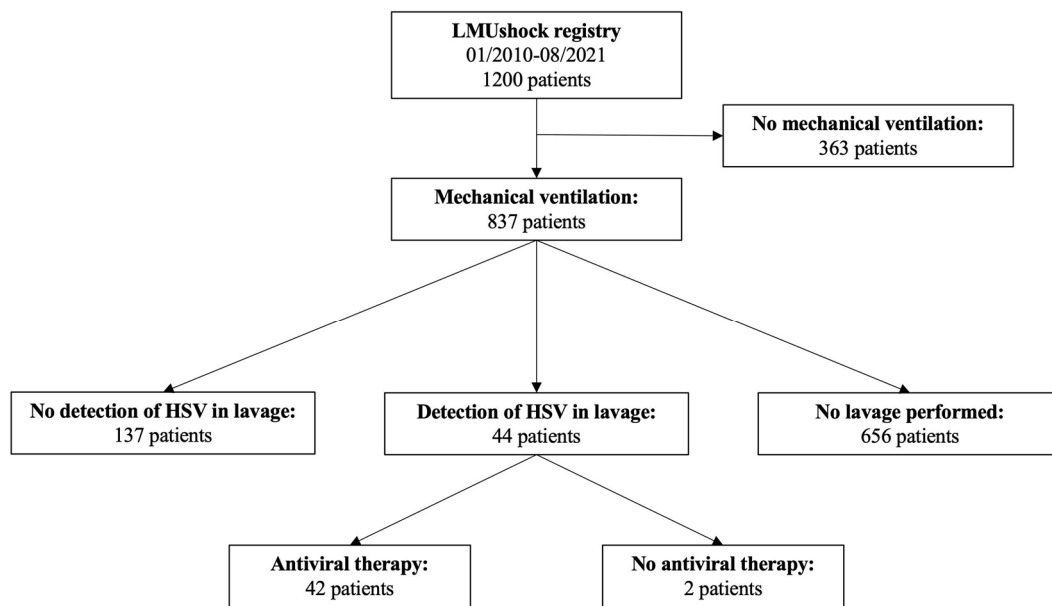

Supplement: s1 [file s1]
